# Supplementary material for: Prognostic Role of Demographic, Injury and Claim Factors in Disabling Pain and Mental Health Conditions 12 Months after Compensable Injury
Source: MDPI journal article supplement (doi:10.3390/ijerph17197320), 2020-10-07
Supplement: s1 [file s1]

**Table S1.** Source of each variable included in the analyses.

|                                                                  | Data source              |                             |                                   |
|------------------------------------------------------------------|--------------------------|-----------------------------|-----------------------------------|
|                                                                  | VST<br>R or<br>VOT<br>OR | Study<br>Questionnaire<br>s | Compensation<br>Research Database |
| Demographics                                                     | Yes                      |                             |                                   |
| Sex                                                              |                          |                             |                                   |
| Age                                                              | Yes                      |                             |                                   |
| Education                                                        | Yes                      |                             |                                   |
| Work before injury                                               | Yes                      |                             |                                   |
| Work status, 12-months                                           | Yes                      | Yes                         |                                   |
| Remoteness of residential location                               | Yes                      |                             |                                   |
| Health                                                           |                          |                             |                                   |
| Comorbid conditions at 12-months                                 |                          | Yes                         |                                   |
| Prior mental health condition                                    | Yes                      |                             |                                   |
| Prior substance use condition                                    | Yes                      |                             |                                   |
| Injury-related characteristics                                   |                          |                             |                                   |
| AIS, $\geq 1$ moderate-severe injury                             | Yes                      |                             |                                   |
| Hospital length of stay                                          | Yes                      |                             |                                   |
| Discharge location                                               | Yes                      |                             |                                   |
| Compensation-related                                             |                          |                             |                                   |
| Compensation scheme                                              | Yes                      |                             |                                   |
| Engaged a lawyer within 12-months post-injury                    |                          | Yes                         |                                   |
| Self at Fault                                                    |                          | Yes                         |                                   |
| Compensation experience                                          |                          | Yes                         |                                   |
| Impairment payment received                                      |                          |                             | Yes                               |
| Independent Medical Examination                                  |                          |                             | Yes                               |
| Total healthcare costs                                           |                          |                             | Yes                               |
| Medical, paramedical and pharmaceutical items                    |                          |                             | Yes                               |
| Income benefits                                                  |                          |                             | Yes                               |
| Opioid medication use                                            |                          |                             | Yes                               |
| Psychotropic medication use                                      |                          |                             | Yes                               |
| Outcomes, pain                                                   |                          |                             |                                   |
| Pain severity ( <u>Brief Pain Inventory</u> )                    |                          | Yes                         |                                   |
| Pain interference (Brief Pain Inventory)                         |                          | Yes                         |                                   |
| Pain-related disability (Roland Morris Disability Questionnaire) |                          | Yes                         |                                   |
| Outcomes, Mental health                                          |                          |                             |                                   |
| Anxiety (Hospital Anxiety and Depression Scale)                  |                          | Yes                         |                                   |
| Depression (Hospital Anxiety and Depression Scale)               |                          | Yes                         |                                   |
| PTSD (Posttraumatic Checklist)                                   |                          | Yes                         |                                   |

**Table S2.** Univariate logistic regression coefficients for the association between demographics, health and injury-related characteristics and disabling pain, mental health condition and injury severity 12-months after compensable injury.

|                                                 |                                   |                    | Disabling pain    | Mental health condition |
|-------------------------------------------------|-----------------------------------|--------------------|-------------------|-------------------------|
| Predictor                                       |                                   | N (%) <sup>+</sup> | OR (95% CI)       | OR (95% CI)             |
| Pre-injury demographics and health              |                                   |                    |                   |                         |
| Age                                             | (continuous)                      |                    | 1.00 (0.98, 1.03) | 0.98 (0.96, 1.00)       |
| Sex                                             | Male                              | 118 (75.2)         | 1.00              | 1.00                    |
|                                                 | Female                            | 39 (24.8)          | 1.76 (0.84, 3.71) | 1.76 (0.85, 3.67)       |
| Education level                                 | University degree                 | 35 (22.3)          | 1.00              | 1.00                    |
|                                                 | Did not complete secondary school | 33 (21.0)          | 2.32 (0.83, 6.22) | 2.05 (0.73, 5.72)       |
|                                                 | Secondary school                  | 27 (17.2)          | 1.28 (0.45, 3.70) | 4.04 (1.37, 11.92)      |
|                                                 | Diploma                           | 62 (39.5)          | 0.70 (0.28, 1.75) | 1.42 (0.53, 3.59)       |
| Employed prior to injury                        | Yes                               | 133 (84.7)         | 1.00              | 1.00                    |
|                                                 | No                                | 24 (15.3)          | 2.09 (0.64, 6.81) | 1.16 (0.35, 3.82)       |
| Remoteness                                      | Major cities                      | 106 (67.5)         | 1.00              | 1.00                    |
|                                                 | Regional/Remote                   | 51 (32.5)          | 0.97 (0.48, 1.97) | 0.86 (0.43, 1.72)       |
| Comorbidities at 12-months                      | None                              | 102 (65.0)         | 1.00              | 1.00                    |
|                                                 | One or more                       | 55 (35.0)          | 1.73 (0.87, 3.42) | 0.77 (0.39, 1.53)       |
| Neighbourhood socioeconomic status, IRSD decile | (continuous)                      | 157                | 0.27 (0.82, 1.06) | 0.97 (0.86, 1.09)       |
| Injury severity                                 |                                   |                    |                   |                         |

|                                                           |                      |                    | Disabling pain     | Mental health condition |
|-----------------------------------------------------------|----------------------|--------------------|--------------------|-------------------------|
| Predictor                                                 |                      | N (%) <sup>+</sup> | OR (95% CI)        | OR (95% CI)             |
| AIS sum                                                   | (continuous)         | 157                | 1.03 (1.00, 1.07)  | 0.99 (0.96, 1.02)       |
| Number of body regions with one or more mod-severe injury | (continuous)         | 157                | 1.37 (1.06, 1.76)  | 1.01 (0.79, 1.28)       |
| Length of hospital stay                                   | 1-2 days             | 29 (18.5)          | 1.00               | 1.00                    |
|                                                           | 3-6 days             | 54 (34.4)          | 2.44 (0.85, 6.99)  | 0.79 (0.32, 1.99)       |
|                                                           | 7-13 days            | 42 (26.8)          | 0.90 (0.28, 2.95)  | 0.64 (0.24, 1.70)       |
|                                                           | ≥14 days             | 32 (20.4)          | 4.93 (1.58, 15.38) | 0.52 (0.18, 1.50)       |
|                                                           |                      |                    |                    |                         |
| Discharge destination                                     | Home                 | 83 (52.9)          | 1.00               | 1.00                    |
|                                                           | Rehabilitation       | 74 (47.1)          | 2.25 (1.15, 4.42)  | 1.47 (0.77, 2.81)       |
| Outcomes and Compensation-related characteristics         |                      |                    |                    |                         |
| Work status, 12-months                                    | Returned to work     | 105 (72.4)         | 1.00               | 1.00                    |
|                                                           | Not returned to work | 40 (27.5)          | 6.29 (2.89, 13.34) | 2.94 (1.43, 6.06)       |
| Impairment payment within 12-months                       | No                   | 113 (72.0)         | 1.00               | 1.00                    |
|                                                           | Yes                  | 44 (28.0)          | 6.16 (2.89, 13.15) | 2.89 (1.41, 5.94)       |
| Self at fault                                             | Yes                  | 52 (33.5)          | 1.00               | 1.00                    |
|                                                           | No                   | 103 (66.5)         | 1.83 (0.87, 3.84)  | 1.79 (0.87, 3.67)       |
| IME in first 12 months post injury                        | No                   | 124 (79.0)         | 1.00               | 1.00                    |
|                                                           | Yes                  | 33 (21.0)          | 3.05 (1.39, 6.72)  | 4.47 (1.97, 10.14)      |

|                                               |                               |                    | Disabling pain    | Mental health condition |
|-----------------------------------------------|-------------------------------|--------------------|-------------------|-------------------------|
| Predictor                                     |                               | N (%) <sup>+</sup> | OR (95% CI)       | OR (95% CI)             |
| Engaged a lawyer within 12-months post-injury | No                            | 99 (63.1)          | 1.00              | 1.00                    |
|                                               | Yes                           | 55 (35.0)          | 4.80 (2.34, 9.84) | 2.86 (1.44, 5.67)       |
| Total health service use costs*               |                               |                    |                   |                         |
| <3 months                                     | (continuous, log transformed) | 157                | 1.48 (0.87, 2.51) | 1.00 (0.63, 1.62)       |
| 3-6 months                                    | (continuous, log transformed) | 157                | 1.50 (1.06, 2.13) | 1.17 (0.88, 1.57)       |
| 6-12 months                                   | (continuous, log transformed) | 157                | 1.76 (1.28, 2.42) | 1.64 (1.23, 2.18)       |

<sup>+</sup> Analyses examining mental health outcomes were missing one participant who was included in the pain analyses. \* Note that the total health service use analysis included a log transformed continuous variable. Therefore the ORs show that with every unit increase in healthcare cost there is a corresponding relative increase in odds of the respective outcome (e.g., every unit increase in healthcare costs at 3-6 months is associated with a 50% increased odds of having disabling pain at 12-months).

**Table S3.** Univariate logistic regression coefficient for the association between compensation scheme experience and disabling pain, mental health condition and injury severity 12-months after compensable injury.

| Predictor                                                      |                                             | N (%) <sup>+</sup> | Disabling pain<br>OR (95% CI) | Mental health<br>condition<br>OR (95% CI) |
|----------------------------------------------------------------|---------------------------------------------|--------------------|-------------------------------|-------------------------------------------|
| Compensation system experience in first 12 months post-injury* | Negative compensation procedural experience | 157                | 1.78 (1.29, 2.45)             | 2.08 (1.49, 2.91)                         |
|                                                                | Compensation supported recovery             | 157                | 0.53 (0.35, 0.80)             | 0.45 (0.30, 0.70)                         |
|                                                                | Positive compensation procedural experience | 157                | 0.70 (0.47, 1.05)             | 0.43 (0.28, 0.67)                         |
| I feel like I have to keep proving my injury and/or disability | Disagree/strongly disagree                  | 72 (48.6)          | 1.00                          | 1.00                                      |
|                                                                | Neither agree or disagree                   | 11 (7.4)           | 2.92 (0.79, 10.81)            | 6.53 (1.69, 25.31)                        |
|                                                                | Agree/strongly agree                        | 65 (43.9)          | 3.00 (1.43, 6.28)             | 4.09 (1.94, 8.66)                         |
| The claims process is stressful and causes me anxiety          | Disagree/strongly disagree                  | 23 (15.3)          | 1.00                          | 1.00                                      |
|                                                                | Neither agree or disagree                   | 42 (28.0)          | 2.25 (0.91, 5.55)             | 1.66 (0.67, 4.09)                         |
|                                                                | Agree/strongly agree                        | 85 (53.8)          | 4.54 (2.00, 10.31)            | 6.33 (2.76, 14.56)                        |
| I am happy with my compensation claim                          | Agree/strongly agree                        | 42 (28.0)          | 1.00                          | 1.00                                      |
|                                                                | Neither agree or disagree                   | 32 (21.3)          | 2.28 (1.03, 4.83)             | 2.15 (1.00, 4.61)                         |
|                                                                | Disagree/strongly disagree                  | 76 (50.7)          | 1.73 (0.66, 4.45)             | 2.58 (1.00, 6.61)                         |

<sup>+</sup> Analyses examining mental health outcomes were missing one participant who was included in the pain analyses. \* The mean score on the compensation experience subscales were included in these analyses, which have a potential score range from zero to five. The OR indicates that for every one point increase in the mean score the relative odds of having disabling pain or mental health conditions is increased or decreased.

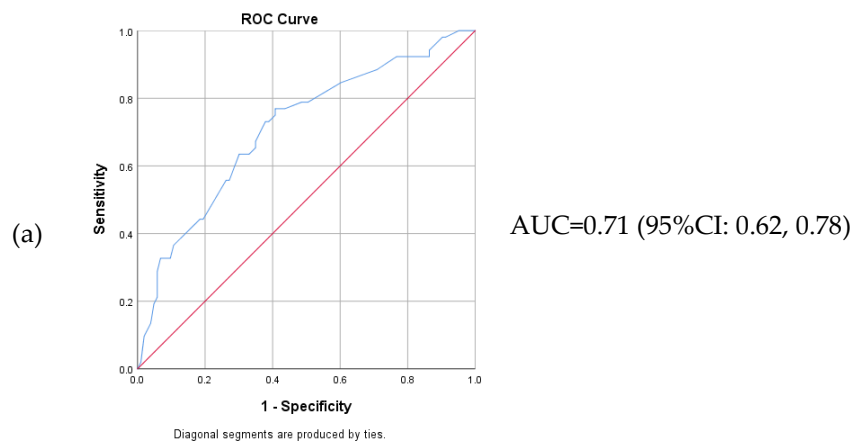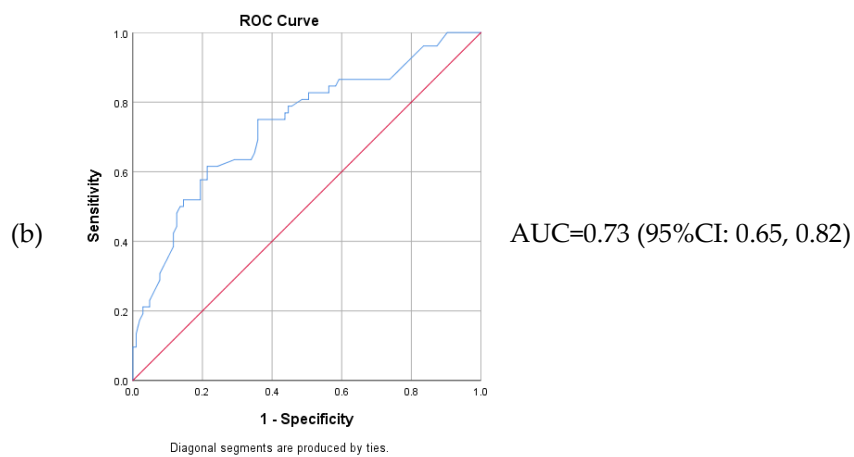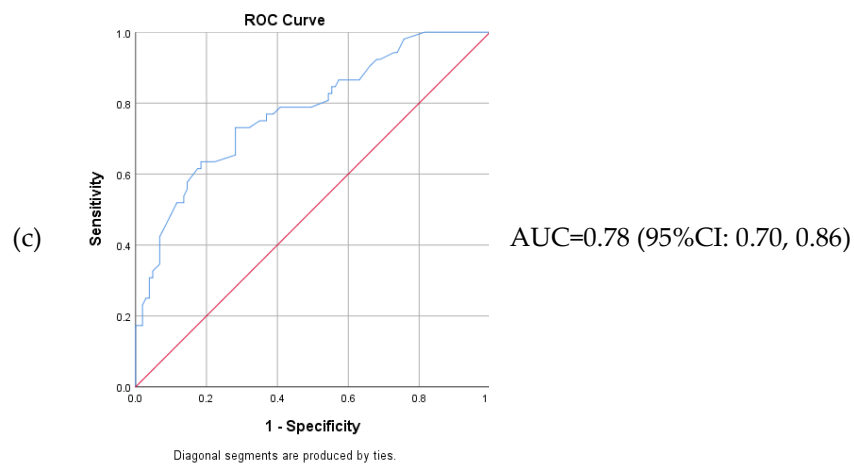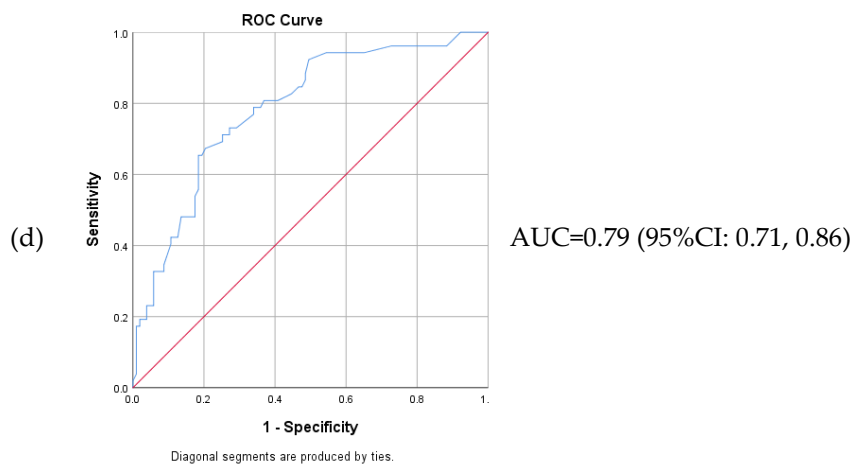

**Figure S1.** Area Under the Curve for the prediction of disabling pain when taking into account (a) the baseline model, and baseline characteristics in addition to claims characteristics in the first three months post-injury (b); 3-6 months post-injury (c); and 6-12 months post-injury (d).

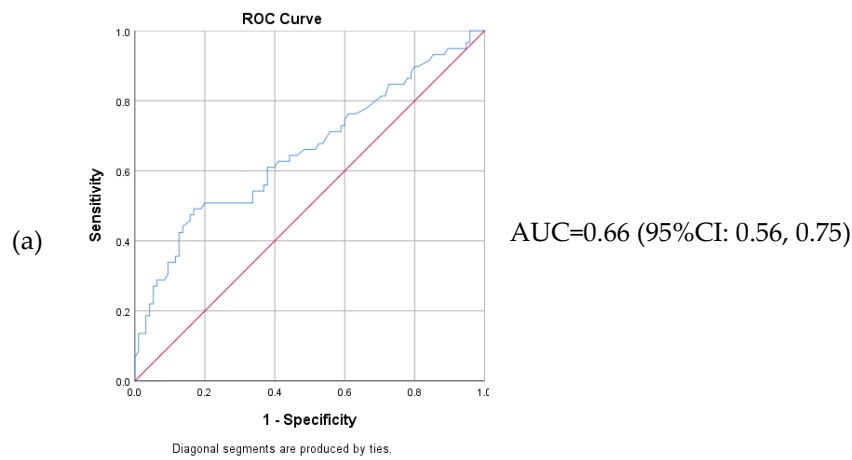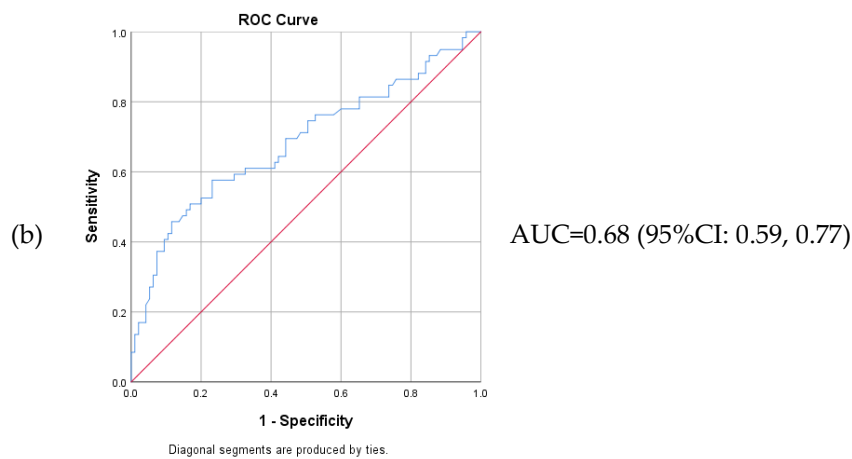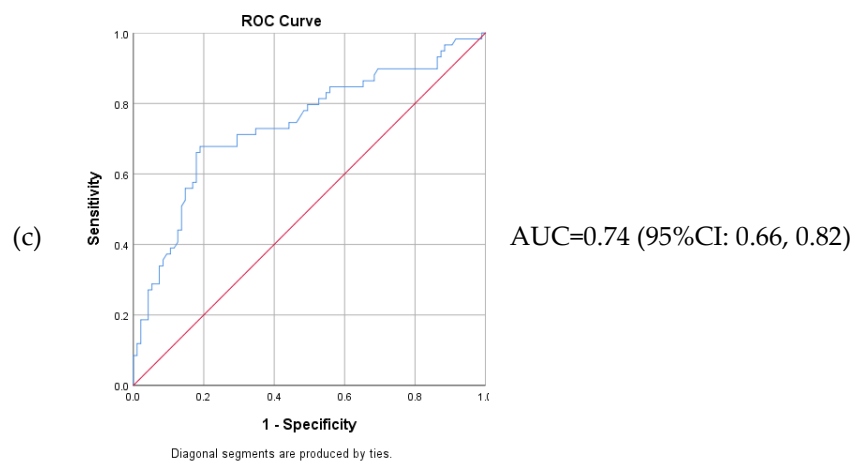

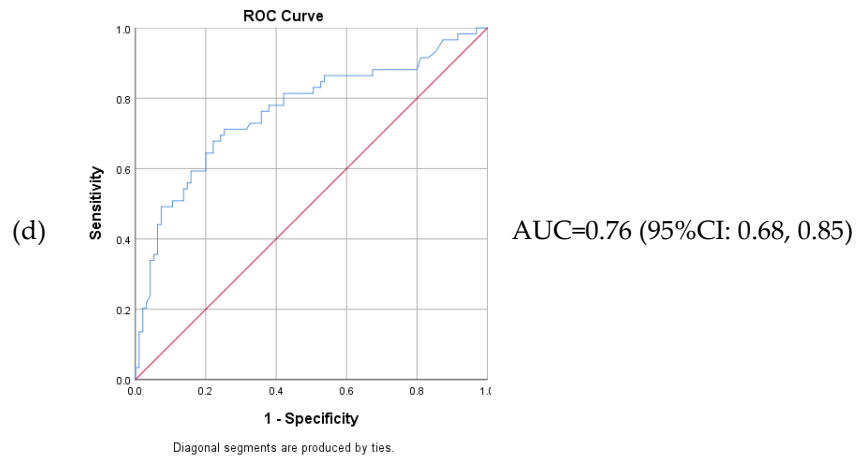

**Figure S2.** Area Under the Curve for the prediction of mental health conditions when taking into account (a) the baseline model, and baseline characteristics in addition to claims characteristics in the first three months post-injury (b); 3-6 months post-injury (c); and 6-12 months post-injury (d).
